# Supplementary material for: Iterative outlier identification for robust cosmogenic 26Al∕10Be burial dating of fluvial terraces: a case study from the Danube River (Vienna Basin, Austria)
Source: Copernicus journal article supplement (doi:10.5194/egqsj-74-59-2025), 2025-02-18
Supplement: Supplementary file 1 [file egqsj-74-59-2025-supplement.pdf]

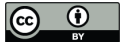

*Supplement of*

**Iterative outlier identification for robust cosmogenic  $^{26}\text{Al}/^{10}\text{Be}$  burial dating of fluvial terraces: a case study from the Danube River (Vienna Basin, Austria)**

**Zsófia Ruzkiczay-Rüdiger et al.**

*Correspondence to:* Zsófia Ruzkiczay-Rüdiger (rrzsofi@geochem.hu), Stephanie Neuhuber (stephanie.neuhuber@boku.ac.at), Esther Hintersberger (esther.hintersberger@geosphere.at), and Jesper Nørgaard (jn@geo.au.dk)

The copyright of individual parts of the supplement might differ from the article licence.

## Contents:

### 1) Model setup

Table S1: Production rates used for the modelling

### 2) Results of the bootstrapping and Post-burial production test

Table S2. Burial age and denudation rate modelling results...

Table S3. Burial age and denudation rate modelling results for the merged dataset...

Fig. S1. Isochron plots and histograms for the 5.5 m level.

Fig. S2 Isochron plots and histograms for the 11.8 m level

Fig. S3. Post-burial  $^{10}\text{Be}$  and  $^{26}\text{Al}$  concentrations in percentage of the measured CRN concentrations

Fig. S4. Comparison plot of bootstrapping using ISO and INV.

### 3) Apparent source denudation rates

Table S4. Minimum and maximum values of the apparent source denudation rates for the two sampled levels of the bootstrap runs using INV.

Table S5. Minimum and maximum values of the apparent source denudation rates for the merged dataset of the bootstrap runs using INV.

### 1) Model setup

Table S1: Production rates used for the modelling

| Production rate at sample location                                     | Surface | 5.5 m depth | 11.7 m depth |
|------------------------------------------------------------------------|---------|-------------|--------------|
| $^{10}\text{Be}$ spallation[atoms/ $\text{g}_{\text{qtz}}/\text{y}$ ]  | 4.819   | 0.005       | 0.000        |
| $^{10}\text{Be}$ slow muons [atoms/ $\text{g}_{\text{qtz}}/\text{y}$ ] | 0.042   | 0.020       | 0.009        |
| $^{10}\text{Be}$ fast muons [atoms/ $\text{g}_{\text{qtz}}/\text{y}$ ] | 0.039   | 0.030       | 0.023        |
| $^{26}\text{Al}$ spallation[atoms/ $\text{g}_{\text{qtz}}/\text{y}$ ]  | 32.288  | 0.033       | 0.000        |
| $^{26}\text{Al}$ slow muons [atoms/ $\text{g}_{\text{qtz}}/\text{y}$ ] | 0.475   | 0.228       | 0.098        |
| $^{26}\text{Al}$ fast muons [atoms/ $\text{g}_{\text{qtz}}/\text{y}$ ] | 0.269   | 0.208       | 0.156        |

## 2) Results of the bootstrapping and Post-burial production test

Table S2. Burial age and denudation rate modelling results using ISO and INV for the two sampled depth levels treated independently. \*: averaged values and standard deviation of the bootstrapped runs.  $R\chi^2$ : reduced  $\chi^2$  values.

|                  |             | ISO        |      |      |           | INV        |      |      |                      |        |      |           |     |
|------------------|-------------|------------|------|------|-----------|------------|------|------|----------------------|--------|------|-----------|-----|
|                  |             | Burial age |      |      | $R\chi^2$ | Burial age |      |      | Sink denudation rate |        |      | $R\chi^2$ |     |
|                  |             | [Ma]       |      |      |           | [Ma]       |      |      | [m/Ma]               |        |      |           |     |
| Complete dataset | All samples | 2.23       | ±    | 0.49 | 3.0       | 2.23       | ±    | 0.40 | 9.7                  | ±      | 1.5  | 1.8       |     |
|                  | Bootstrap   | w/o #10    | 2.67 | ±    | 0.71      | 2.9        | 2.25 | ±    | 0.40                 | 9.1    | ±    | 1.4       | 2.2 |
|                  |             | w/o #11    | 1.93 | ±    | 0.51      | 3.0        | 1.90 | ±    | 0.34                 | 12.7   | ±    | 2.0       | 2.1 |
|                  |             | w/o #12    | 2.35 | ±    | 0.54      | 3.0        | 2.34 | ±    | 0.42                 | 9.7    | ±    | 1.5       | 2.1 |
|                  |             | w/o #13    | 2.39 | ±    | 0.55      | 2.5        | 2.38 | ±    | 0.43                 | 9.6    | ±    | 1.4       | 1.5 |
|                  |             | w/o #15    | 1.21 | ±    | 0.35      | 2.0        | 1.22 | ±    | 0.22                 | 12.1   | ±    | 1.9       | 1.1 |
|                  |             | mean*      | 2.11 | ±    | 0.79      | 2.7        | 2.02 | ±    | 0.61                 | 10.7   | ±    | 2.3       | 1.2 |
| w/o #15          | All samples | 1.21       | ±    | 0.35 | 2.0       | 1.22       | ±    | 0.22 | 12.1                 | ±      | 1.9  | 1.1       |     |
|                  | Bootstrap   | w/o #10    | 1.46 | ±    | 0.44      | 1.3        | 1.44 | ±    | 0.27                 | 7.3    | ±    | 1.2       | 0.3 |
|                  |             | w/o #11    | 0.90 | ±    | 0.36      | 1.1        | 0.88 | ±    | 0.16                 | 32.6   | ±    | 5.3       | 0.2 |
|                  |             | w/o #12    | 1.06 | ±    | 0.41      | 3.0        | 1.04 | ±    | 0.19                 | 13.8   | ±    | 2.2       | 2.1 |
|                  |             | w/o #13    | 1.47 | ±    | 0.53      | 2.8        | 1.48 | ±    | 0.26                 | 10.8   | ±    | 1.6       | 1.8 |
|                  |             | mean*      | 1.22 | ±    | 0.53      | 2.1        | 1.21 | ±    | 0.37                 | 16.1   | ±    | 11.7      | 0.6 |
| Complete dataset | All samples | 0.78       | ±    | 0.14 | 4.0       | 0.82       | ±    | 0.15 | 66.1                 | ±      | 12.4 | 2.9       |     |
|                  | Bootstrap   | w/o #20    | 0.68 | ±    | 0.13      | 3.8        | 0.72 | ±    | 0.14                 | 4.1E+5 | ±    | 7.9E+4    | 2.7 |
|                  |             | w/o #21    | 0.44 | ±    | 0.15      | 2.7        | 0.58 | ±    | 0.11                 | 2.9E+8 | ±    | 5.4E+7    | 1.8 |
|                  |             | w/o #22    | 0.79 | ±    | 0.17      | 4.8        | 0.83 | ±    | 0.16                 | 63.15  | ±    | 12.04     | 3.8 |
|                  |             | w/o #23    | 0.89 | ±    | 0.16      | 3.6        | 0.92 | ±    | 0.17                 | 60.86  | ±    | 11.68     | 2.7 |
|                  |             | w/o #24    | 1.22 | ±    | 0.23      | 2.4        | 1.27 | ±    | 0.24                 | 4.68   | ±    | 0.83      | 1.3 |
|                  |             | w/o #25    | 0.78 | ±    | 0.14      | 4.8        | 0.82 | ±    | 0.15                 | 73.17  | ±    | 13.81     | 3.8 |
| mean*            | 0.80        | ±          | 0.30 | 3.6  | 0.86      | ±          | 0.29 | -    |                      | -      | 2.0  |           |     |
| w/o #24          | All samples | 1.22       | ±    | 0.23 | 2.4       | 1.27       | ±    | 0.22 | 4.7                  | ±      | 0.8  | 1.3       |     |
|                  | Bootstrap   | w/o #20    | 1.20 | ±    | 0.29      | 3.1        | 1.22 | ±    | 0.21                 | 6.0    | ±    | 1.0       | 1.9 |
|                  |             | w/o #21    | 0.85 | ±    | 0.25      | 1.8        | 0.91 | ±    | 0.16                 | 11.7   | ±    | 2.1       | 0.8 |
|                  |             | w/o #22    | 1.28 | ±    | 0.26      | 2.9        | 1.32 | ±    | 0.23                 | 4.5    | ±    | 0.8       | 1.8 |
|                  |             | w/o #23    | 1.28 | ±    | 0.23      | 1.8        | 1.32 | ±    | 0.24                 | 7.1    | ±    | 1.3       | 0.8 |
|                  |             | w/o #25    | 1.42 | ±    | 0.27      | 2.2        | 1.34 | ±    | 0.23                 | 2.4    | ±    | 0.4       | 1.1 |
| mean*            | 1.20        | ±          | 0.34 | 2.4  | 1.22      | ±          | 0.28 | 6.3  | ±                    | 3.7    | 0.8  |           |     |

Table S3. Burial age and denudation rate modelling results for the merged dataset using INV on the complete and bootstrapped datasets. \*: averaged values and standard deviation of the bootstrapped runs.  $R\chi^2$ : reduced  $\chi^2$  values.

|                  |             | INV        |      |      |                      |      |     | $R\chi^2$ |     |
|------------------|-------------|------------|------|------|----------------------|------|-----|-----------|-----|
|                  |             | Burial age |      |      | Sink denudation rate |      |     |           |     |
|                  |             | [Ma]       |      |      | [m/Ma]               |      |     |           |     |
| Complete dataset | All samples | 1.13       | ±    | 0.21 | 22.3                 | ±    | 4.1 | 3.4       |     |
|                  | Bootstrap   | w/o #10    | 1.12 | ±    | 0.21                 | 23.4 | ±   | 4.3       | 3.8 |
|                  |             | w/o #11    | 0.98 | ±    | 0.18                 | 49.7 | ±   | 9.2       | 3.1 |
|                  |             | w/o #12    | 1.13 | ±    | 0.21                 | 22.4 | ±   | 4.1       | 3.8 |
|                  |             | w/o #13    | 1.14 | ±    | 0.21                 | 22.3 | ±   | 4.1       | 3.8 |
|                  |             | w/o #15    | 0.97 | ±    | 0.18                 | 19.8 | ±   | 3.7       | 1.9 |
|                  |             | w/o #20    | 1.11 | ±    | 0.20                 | 25.3 | ±   | 4.7       | 3.6 |
|                  |             | w/o #21    | 1.06 | ±    | 0.20                 | 25.5 | ±   | 4.7       | 3.8 |
|                  |             | w/o #22    | 1.20 | ±    | 0.22                 | 20.0 | ±   | 3.7       | 3.7 |
|                  |             | w/o #23    | 1.20 | ±    | 0.22                 | 19.2 | ±   | 3.6       | 3.0 |
|                  |             | w/o #24    | 1.28 | ±    | 0.24                 | 14.7 | ±   | 2.6       | 2.9 |
|                  |             | w/o #25    | 1.27 | ±    | 0.23                 | 22.5 | ±   | 4.1       | 3.8 |
| mean*            | 1.13        | ±          | 0.23 | 24.1 | ±                    | 10.2 | 3.0 |           |     |
| w/o #15 and #24  | All samples | 1.10       | ±    | 0.20 | 11.9                 | ±    | 2.2 | 1.0       |     |
|                  | Bootstrap   | w/o #10    | 1.21 | ±    | 0.22                 | 7.1  | ±   | 1.3       | 0.8 |
|                  |             | w/o #11    | 1.02 | ±    | 0.18                 | 17.3 | ±   | 3.3       | 1.0 |
|                  |             | w/o #12    | 1.09 | ±    | 0.20                 | 11.6 | ±   | 2.2       | 1.1 |
|                  |             | w/o #13    | 1.10 | ±    | 0.20                 | 11.9 | ±   | 2.2       | 1.2 |
|                  |             | w/o #20    | 1.09 | ±    | 0.19                 | 12.9 | ±   | 2.4       | 1.1 |
|                  |             | w/o #21    | 0.89 | ±    | 0.16                 | 17.0 | ±   | 3.2       | 0.7 |
|                  |             | w/o #22    | 1.14 | ±    | 0.20                 | 11.4 | ±   | 2.1       | 1.1 |
|                  |             | w/o #23    | 1.22 | ±    | 0.22                 | 11.3 | ±   | 2.1       | 0.7 |
|                  |             | w/o #25    | 1.10 | ±    | 0.20                 | 11.4 | ±   | 2.0       | 1.1 |
| mean*            | 1.10        | ±          | 0.22 | 12.4 | ±                    | 3.9  | 0.8 |           |     |

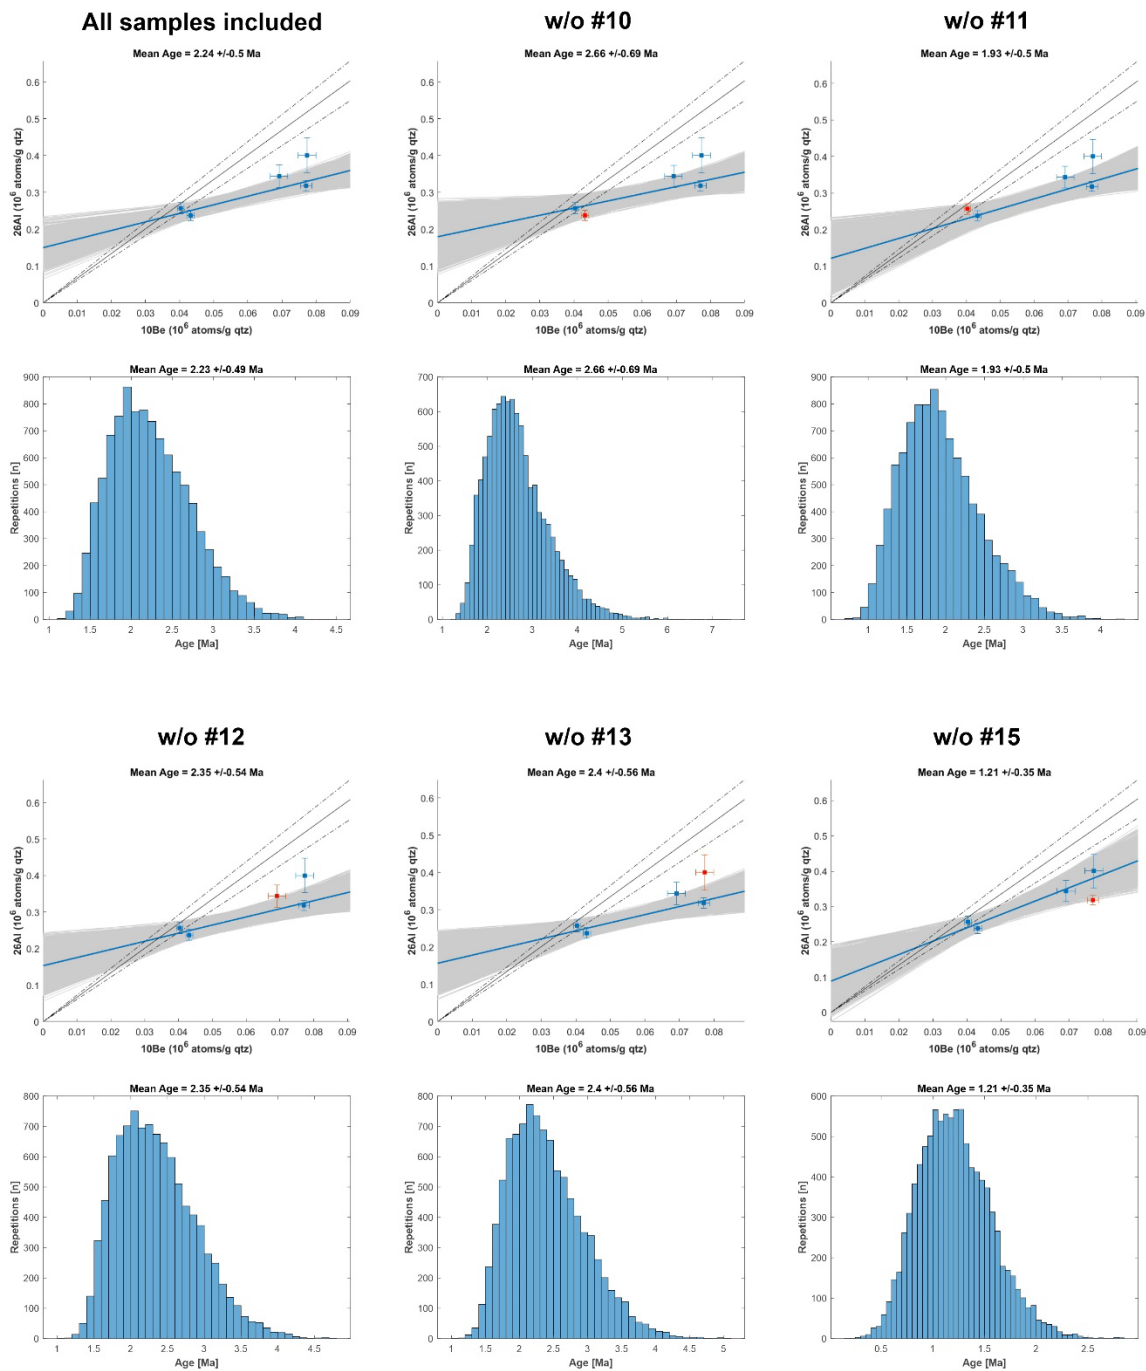

Fig. S1. Isochron plots and histograms for the 5.5 m level.

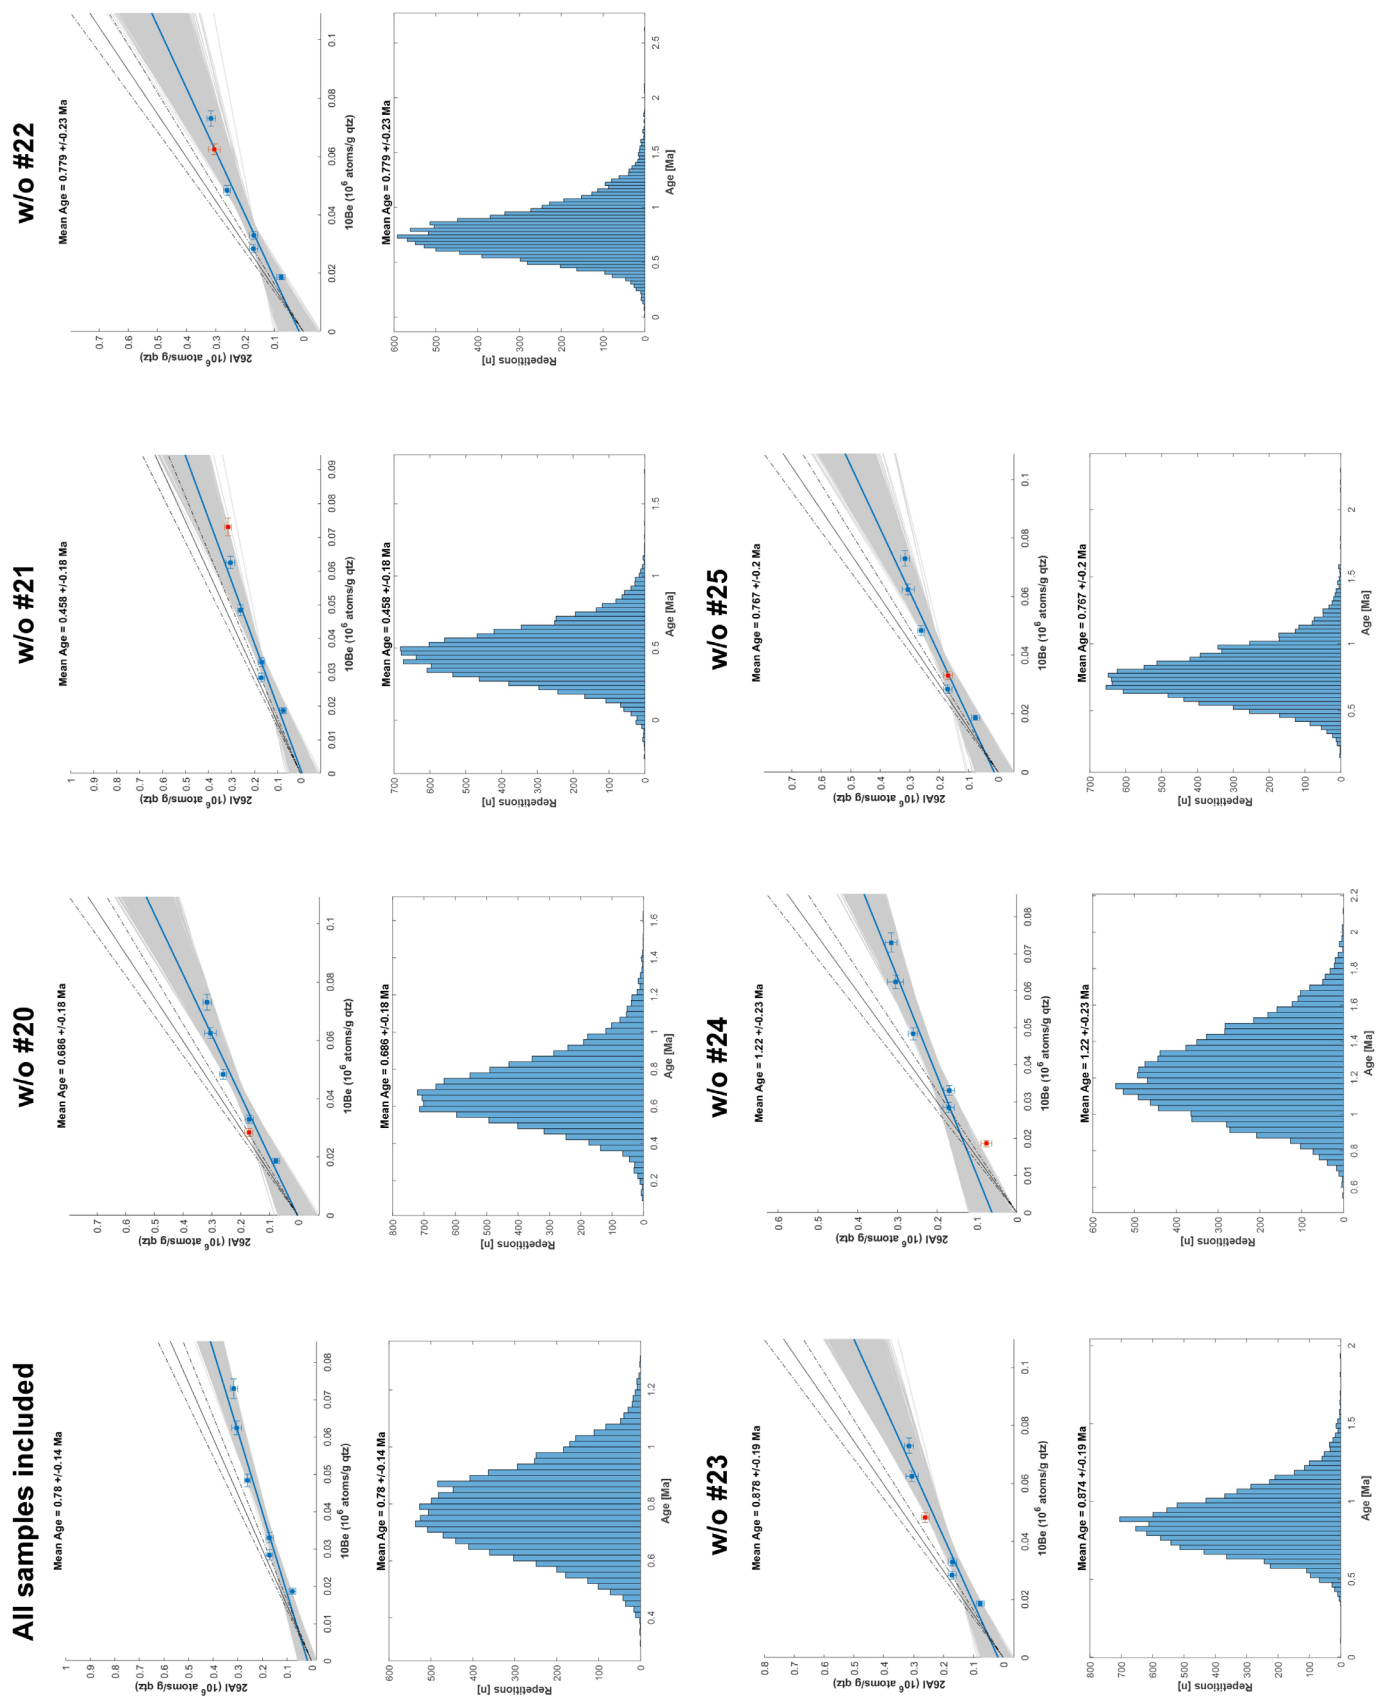

Fig. S2 Isochron plots and histograms for the 11.8 m level

## Upper level

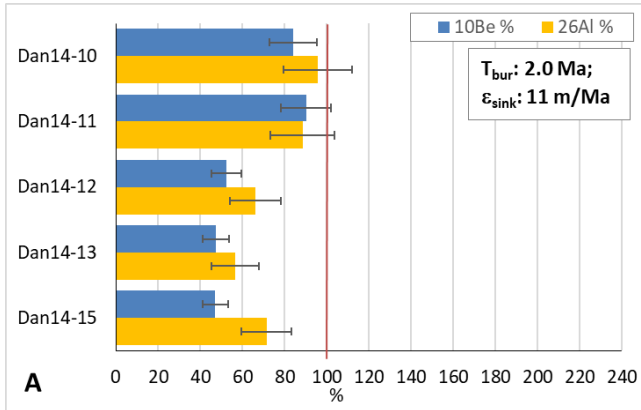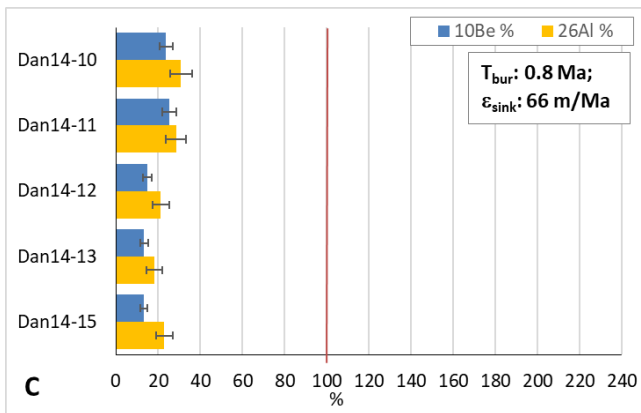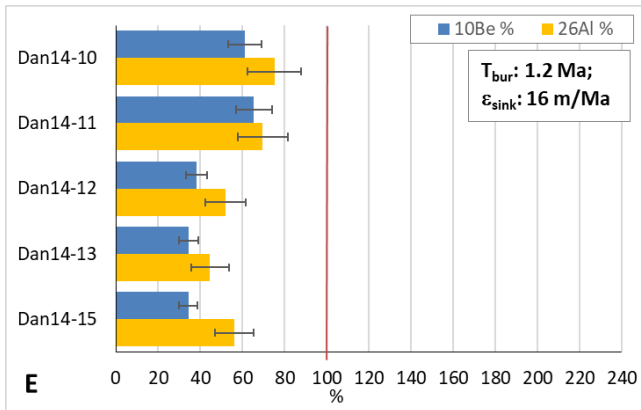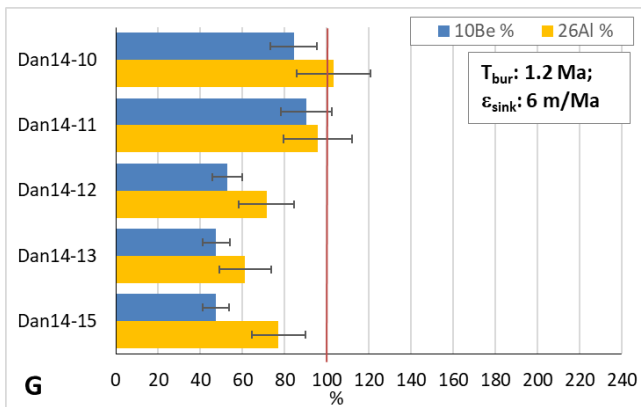

## Lower level

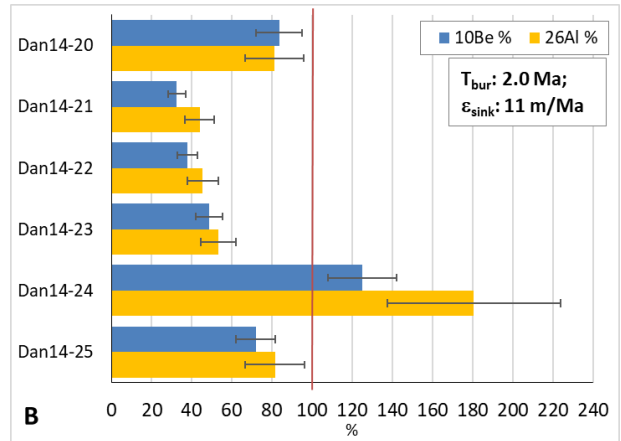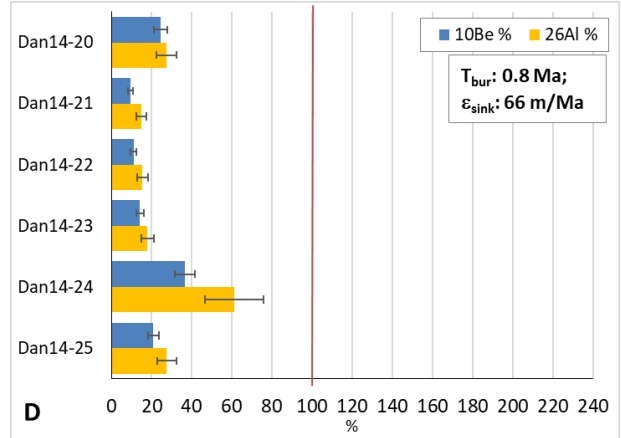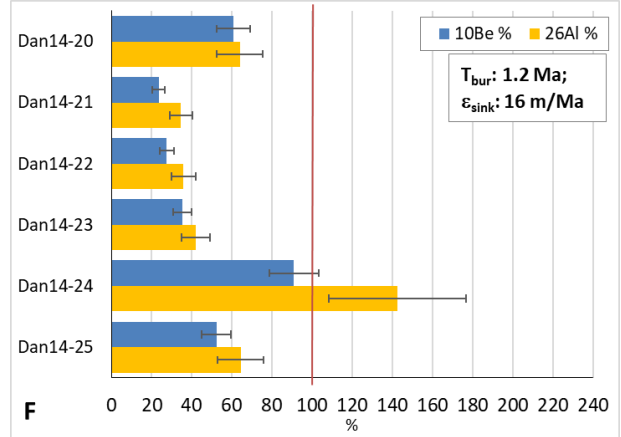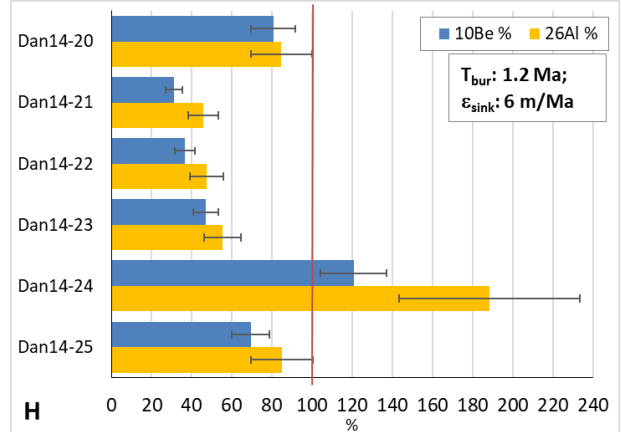

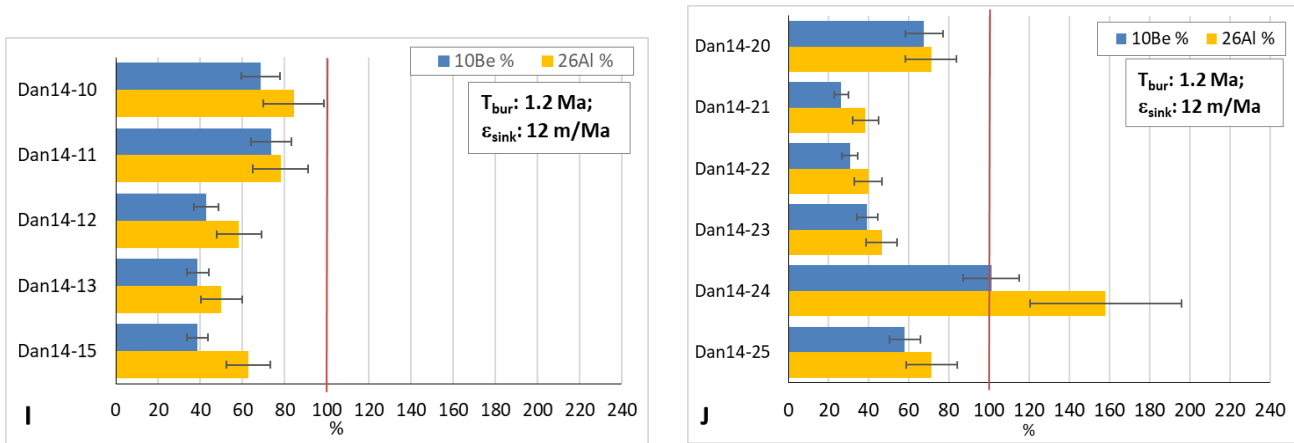

Fig. S3. Post-burial  $^{10}\text{Be}$  and  $^{26}\text{Al}$  concentrations in percentage of the measured CRN concentrations for different modelled scenarios for the upper (A, C, E, G, I, left column) and the lower (B, D, F, H, J, right column) levels. The red line marks 100%, where the measured CRN and modelled post-burial CRN inventories are equal. Samples below 100% contain CRN from previous exposure and can provide information on the age. Samples above 100% accumulated all CRN during the depositional period. For the most probable scenario (I, J) of  $\sim 1.2$  Ma burial age ( $T_{\text{bur}}$ ) and 12 m/Ma sink denudation rate ( $\epsilon_{\text{sink}}$ ) the only sample failing this test is #24. Note that during a longer burial duration of 2 Ma (A, B) or at a slower denudation rate of 6 m/Ma (G, H) the  $^{26}\text{Al}$  inherited inventories of sample #10 and #11 would have also been decayed. The error bars include the uncertainties of the measured nuclide concentrations, the surface production rates and half-lives of  $^{10}\text{Be}$  and  $^{26}\text{Al}$ . The observed higher proportion of  $^{26}\text{Al}$  is a result of higher  $^{26}\text{Al}/^{10}\text{Be}$  production rate ratios at 5-12 m depth compared to the surface values, which makes the post-burial  $^{26}\text{Al}$  inventory larger. Note that a longer burial time and/or the slower denudation rate results in larger ratio of the post-burial  $^{10}\text{Be}$  and  $^{26}\text{Al}$  inventories.

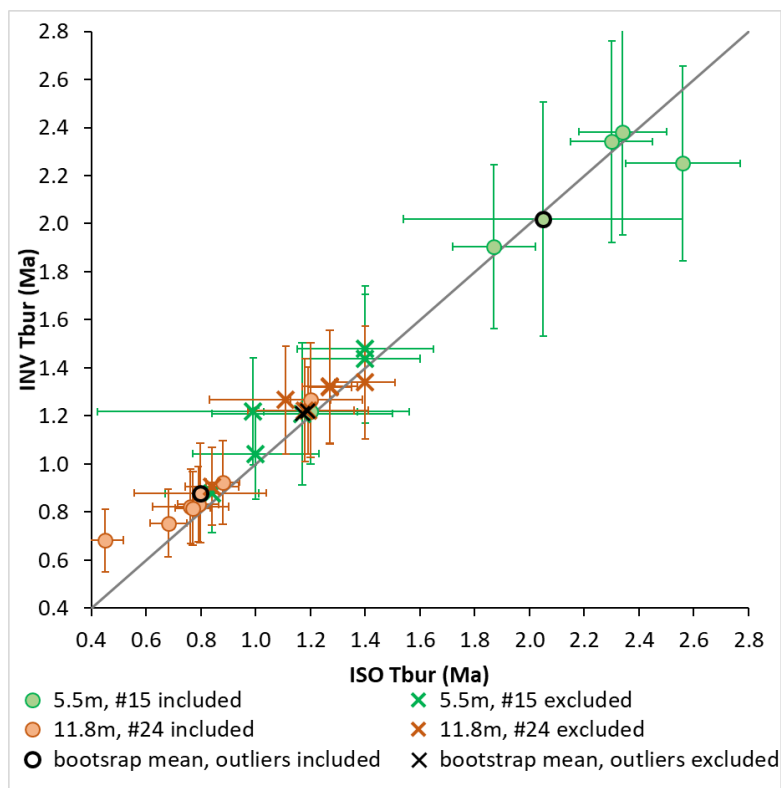

Fig. S4. Comparison plot of bootstrapping using ISO and INV. Note that i) burial ages provided by the two methods are consistent and ii) burial ages of the upper level are much older than those of the lower level when the outliers are included, leading to a stratigraphically impossible situation. Ages are much more clustered when outliers are excluded from both sample sets, and the burial ages of the two levels are consistent.



### 3) Apparent source denudation rates

Source denudation rates are termed apparent, as this is the only variable to modulate the parameters of the source area that define the CRN amounts and ratio ( $R_0$ ) the samples are buried with. For small catchments, with no significant variability of the latitude and elevation of the catchment area, the source production rates can be considered constant. In such cases, the modelled source denudation rates can provide a good estimate of the true natural value. However, in the case of large rivers, like the Danube, the variability in altitude and latitude throughout the catchment is considerable, leading to large variability of the production rates throughout the source area. In this situation, the denudation rate cannot be regarded as the only or the most deterministic parameter for the amounts of CRN accumulated during exposure and subsequent erosion. This is why in cases like the present study, the INV modelled source denudation rates scatter widely (Tables S4, S5) and do not reflect the actual true source denudation rates and have to be regarded as apparent.

Table S4. Minimum and maximum values of the apparent source denudation rates for the two sampled levels of the bootstrap runs using INV.

|                               |                  |             | Source denudation rate |        |       |         |
|-------------------------------|------------------|-------------|------------------------|--------|-------|---------|
|                               |                  |             | [m/Ma]                 |        |       |         |
|                               |                  |             | min                    | -      | max   |         |
| Upper level<br>(5.5 m depth)  | Complete dataset | All samples | 47                     | -      | 1 810 |         |
|                               |                  | Bootstrap   | w/o #10                | 48     | -     | 287 110 |
|                               |                  |             | w/o #11                | 48     | -     | 222     |
|                               |                  |             | w/o #12                | 45     | -     | 2 249   |
|                               |                  |             | w/o #13                | 45     | -     | 5 570   |
|                               |                  |             | w/o #15                | 63     | -     | 279     |
|                               | mean*            | 50          | -                      | 59 086 |       |         |
|                               | w/o #15          | All samples | 63                     | -      | 279   |         |
|                               |                  | Bootstrap   | w/o #10                | 68     | -     | 1 058   |
|                               |                  |             | w/o #11                | 58     | -     | 134     |
|                               |                  |             | w/o #12                | 65     | -     | 235     |
| w/o #13                       |                  |             | 73                     | -      | 376   |         |
| mean                          |                  |             | 66                     | -      | 451   |         |
| Lower level<br>(11.6 m depth) | Complete dataset | All samples | 57                     | -      | 316   |         |
|                               |                  | Bootstrap   | w/o # 20               | 10     | -     | 207     |
|                               |                  |             | w/o # 21               | 10     | -     | 223     |
|                               |                  |             | w/o # 22               | 57     | -     | 321     |
|                               |                  |             | w/o #23                | 54     | -     | 314     |
|                               |                  |             | w/o # 24               | 62     | -     | 771     |
|                               |                  |             | w/o #25                | 57     | -     | 303     |
|                               | mean             | 42          | -                      | 357    |       |         |
|                               | w/o #25          | All samples | 62                     | -      | 771   |         |
|                               |                  | Bootstrap   | w/o #20                | 61     | -     | 318     |
|                               |                  |             | w/o #21                | 76     | -     | 296     |
| w/o # 22                      |                  |             | 61                     | -      | 938   |         |
| w/o #23                       |                  |             | 57                     | -      | 533   |         |
| w/o #24                       |                  |             | 64                     | -      | 4 000 |         |
| mean*                         | 64               | -           | 1 217                  |        |       |         |

Table S5. Minimum and maximum values of the apparent source denudation rates for the merged dataset of the bootstrap runs using INV.

|                  |             | Source denudation rate |       |     |       |
|------------------|-------------|------------------------|-------|-----|-------|
|                  |             | [m/Ma]                 |       |     |       |
|                  |             | min                    | -     | max |       |
| Complete dataset | All samples | 54                     | -     | 801 |       |
|                  | Bootstrap   | w/o #10                | 56    | -   | 734   |
|                  |             | w/o #11                | 52    | -   | 346   |
|                  |             | w/o #12                | 53    | -   | 794   |
|                  |             | w/o #13                | 53    | -   | 803   |
|                  |             | w/o #15                | 60    | -   | 875   |
|                  |             | w/o #20                | 53    | -   | 646   |
|                  |             | w/o #21                | 59    | -   | 633   |
|                  |             | w/o #22                | 52    | -   | 1 058 |
|                  |             | w/o #23                | 50    | -   | 1 309 |
|                  |             | w/o #24                | 53    | -   | 273   |
|                  |             | w/o #25                | 53    | -   | 786   |
|                  | mean*       | 54                     | -     | 755 |       |
| w/o #15 and #24  | All samples | 60                     | -     | 310 |       |
|                  | Bootstrap   | w/o #10                | 60    | -   | 579   |
|                  |             | w/o #11                | 59    | -   | 251   |
|                  |             | w/o #12                | 60    | -   | 314   |
|                  |             | w/o #13                | 59    | -   | 309   |
|                  |             | w/o #20                | 59    | -   | 251   |
|                  |             | w/o #21                | 65    | -   | 254   |
|                  |             | w/o #22                | 59    | -   | 320   |
|                  |             | w/o #23                | 56    | -   | 329   |
|                  |             | w/o #25                | 60    | -   | 317   |
|                  |             |                        | mean* | 60  | -     |
